# Supplementary material for: Aurora B kinase activity is regulated by SET/TAF1 on Sgo2 at the inner centromere
Source: PubMed Central journal article supplement — J Cell Biol. 2019 Sep 16;218(10):3223–36. doi: 10.1083/jcb.201811060 (PMC6781429; doi:10.1083/jcb.201811060), 2019-09-16
Supplement: JCB_201811060_sm.pdf [file JCB_201811060_sm.pdf]

## Supplemental material

Asai et al., <https://doi.org/10.1083/jcb.201811060>

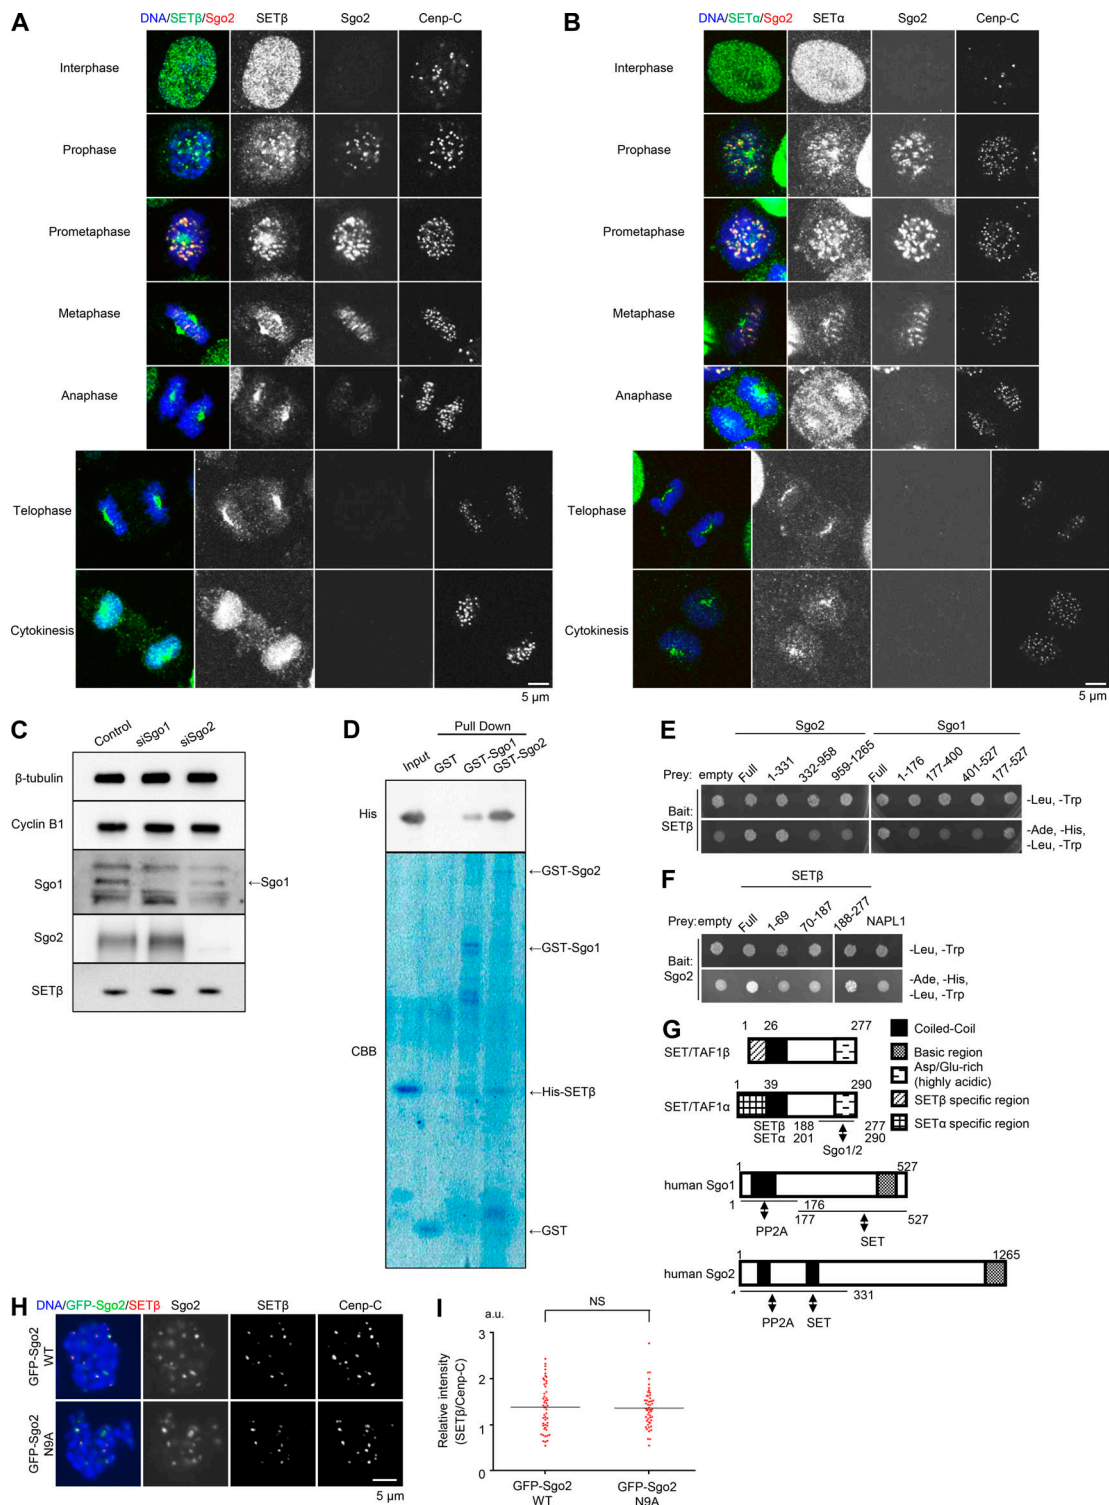

Figure S1. **SET localizes at centromeres through direct interaction with Sgo2 during mitosis.** (A and B) SETβ (A) and SETα (B) localize in the nucleus during interphase and at the centromere during mitosis. (C) Sgo1 and Sgo2 were knocked down with siRNA. HeLa cells treated with Sgo1, Sgo2, or control siRNA were analyzed by immunoblot using anti-β-tubulin, anti-SETβ, anti-Sgo1, and anti-Sgo2 antibodies. (D) His<sub>6</sub>-SETβ protein was pre-incubated with GST, GST-Sgo1, or GST-Sgo2, pulled down with glutathione-sepharose beads, and analyzed by immunoblot using anti-His antibody or Coomassie brilliant blue. (E and F) Yeast two-hybrid assay indicates that SETβ interacts with the middle and C-terminus of Sgo1 (177–527 aa) and the N-terminus of Sgo2 (1–331 aa) through its C-terminal domain (188–277 aa). (G) Schematic diagrams indicate the interaction domains between human Sgo1, human Sgo2, and human SET/TAF1α/β. Coiled-coil domain (Zaytsev et al., 2016), basic region (gray), and Asp/Glu-rich (highly acidic) region (dotted) of SETα/β. (H and I) SETβ localizes at centromeres without direct interaction with PP2A on Sgo2. Signals for GFP-Sgo2 WT or N9A and SETβ were arrested at prometaphase in Sgo2 RNAi cells expressing RNAi-resistant GFP-Sgo2 WT or N9A defective for interaction with PP2A. Each bar represents the mean (n = 50 centromeres from 10 cells, 5 centromeres per cell; Mann-Whitney U test). Scale bars, 5 μm.

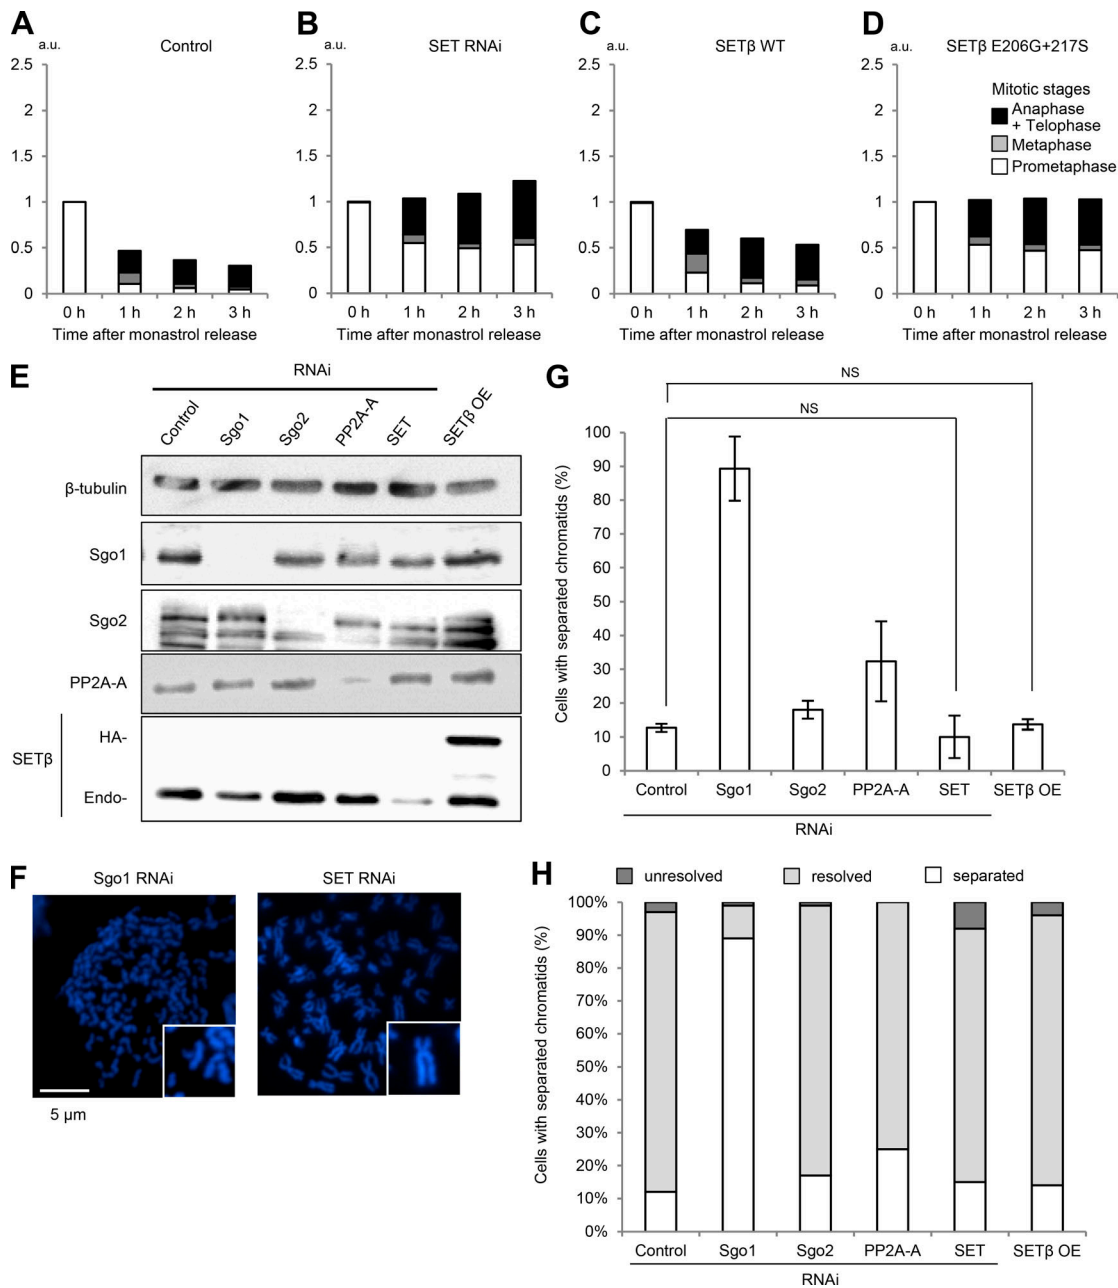

Figure S2. **SET depletion causes mitotic delay following chromosome misalignment. (A–D)** After double-thymidine block and release, cells with or without HA-SET WT or E206G+L217S replacement were arrested with monastrol for 5 h and released. Graph shows the populations of the indicated stages in mitosis at each time point after release from monastrol ( $n = 3$  independent experiments, 100 mitotic cells per experiment). **(E)** Extracts from mitotic HeLa cells after treatment with siRNA or shRNA virus, or transfection with HA-SET $\beta$  were immunoblotted with the indicated antibodies. Endo, endogenous; OE, overexpression. **(F)** Mitotically synchronized HeLa cells after treatment with siRNA or shRNA, or transfection with HA-SET $\beta$ , were collected by mitotic shake-off, and the chromosomes were spread and stained with DAPI. Scale bar, 5  $\mu$ m. **(G and H)** The frequencies (%) of cells showing separated chromatids (G) and unresolved chromatids (H) were determined. Each bar represents SD ( $n = 3$  independent experiments, 100 cells per experiment).

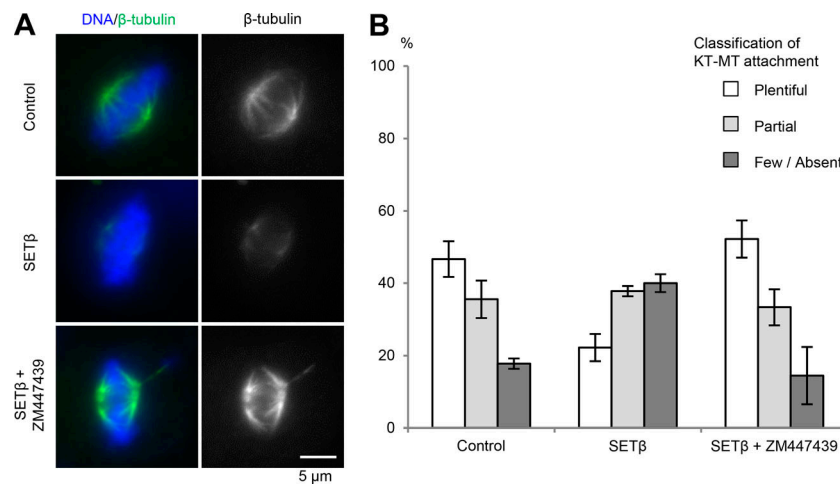

Figure S3. **Aurora B inactivation stabilizes K-fibers, counteracting SETβ overexpression.** (A and B) Cells were transfected with control or HA-SETβ plasmids, arrested in mitosis by nocodazole treatment for 6 h, and released into MG132 for 2 h with or without ZM447439 treatment for 30 min, before cold treatment and fixation as shown in Fig. 3 D. Bars represent SD ( $n = 3$  independent experiments, 100 cells per experiment).

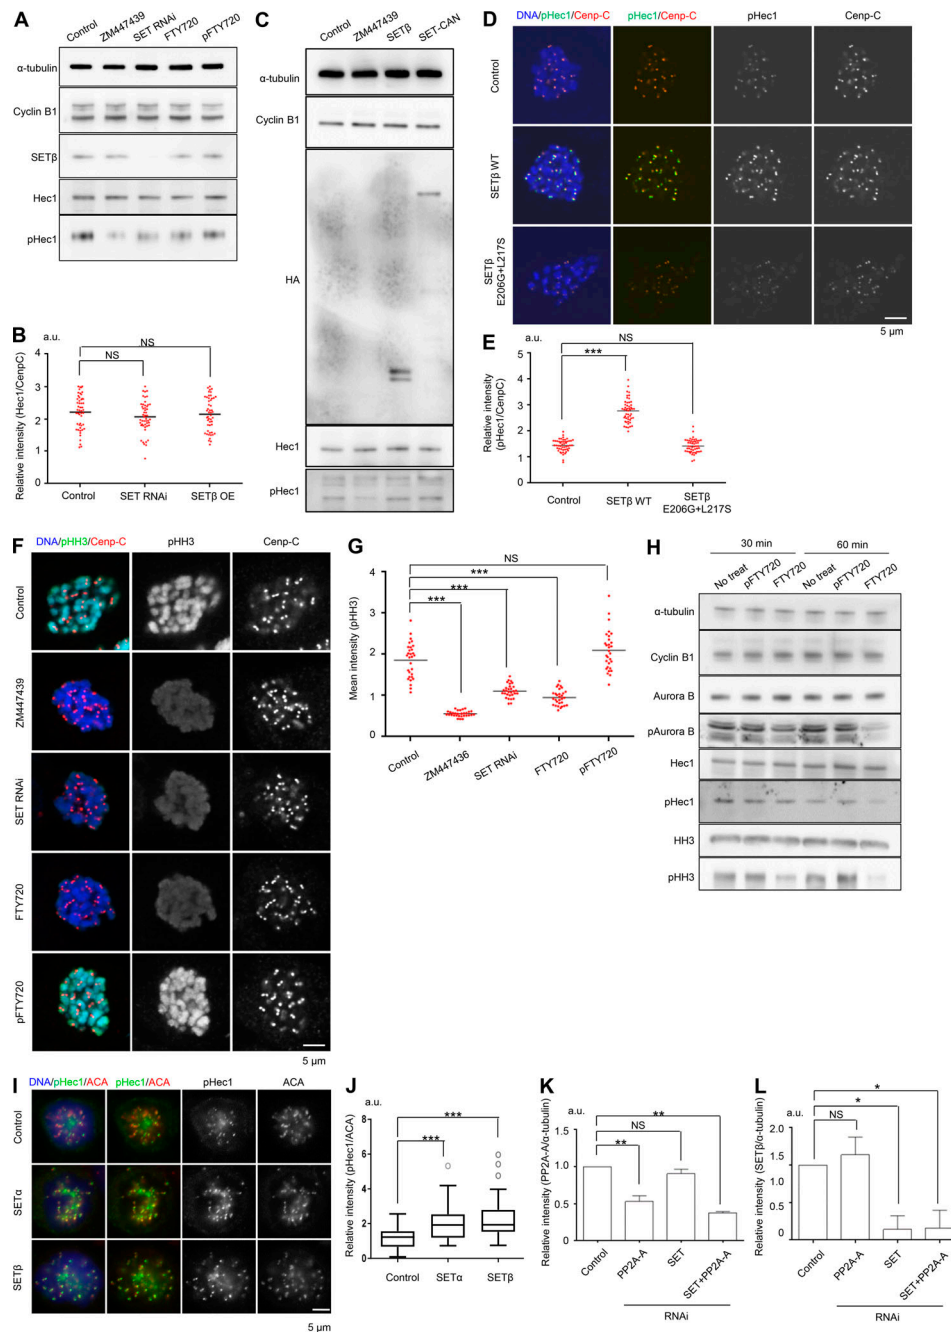

**Figure S4. SETβ is required for the phosphorylation of Aurora B substrates. (A)** HeLa cells infected with control or shSET viruses were synchronized at prometaphase with nocodazole for 3 h, including treatment with or without ZM447439 for 30 min, FTY720 for 1 h, or pFTY720 for 1 h. Mitotic cells were collected by shake-off and analyzed by immunoblotting with the indicated antibodies. **(B)** Neither SET depletion nor SETβ overexpression affected the amount of Hec1 protein at kinetochores. HeLa cells infected with control or shSET viruses and transfected with HA-SETβ or control plasmids were synchronized with nocodazole for 3 h and then immunostained with anti-Hec1 antibody and Cenp-C. Each bar represents the mean ( $n = 50$  kinetochore pairs from 10 cells; Mann-Whitney  $U$  test). **(C)** HeLa cells transfected with HA-SETβ or HA-SET-CAN were synchronized at prometaphase with nocodazole for 3 h, including treatment with or without ZM447439 for 30 min. Mitotic cells were collected by shake-off and analyzed by immunoblotting with the indicated antibodies. **(D and E)** HeLa cells transfected with control, HA-SETβ WT, or E206G+L217S plasmids were synchronized at prometaphase with colcemid for 3 h and then immunostained with anti-phospho-Hec1 and anti-Cenp-C antibodies. Each bar represents the mean ( $n = 50$  kinetochore pairs from 10 cells; Mann-Whitney  $U$  test;  $***, P < 0.001$ ). Scale bar, 5 μm. **(F and G)** HeLa cells infected with control or shSET viruses were synchronized at prometaphase with colcemid for 3 h, including treatment with or without ZM447439 for 30 min, FTY720, or pFTY720 for 60 min. Then, cells were immunostained with anti-phospho-histone H3 (HH3 pS10) and anti-Cenp-C antibodies. Scale bar, 5 μm. Each bar represents the mean ( $n = 30$  cells; Mann-Whitney  $U$  test;  $***, P < 0.001$ ). **(H)** HeLa cells were synchronized at prometaphase with nocodazole for 3 h, including treatment with or without FTY720 or pFTY720 as a negative control for 30 or 60 min and analyzed by immunoblotting with the indicated antibodies. **(I and J)** Mitotically synchronized HeLa cells transfected with control, HA-SETβ or HA-SETα plasmids were immunostained with anti-phospho-Hec1 antibody and ACA. Bars represent whiskers and median ( $n = 40$  kinetochore pairs from 8 cells; Mann-Whitney  $U$  test;  $***, P < 0.001$ ). Scale bar, 5 μm. **(K and L)** Relative intensities of PP2A-A/α-tubulin or SETβ/α-tubulin of Fig. 4 F were quantified, respectively. Bars represent SD ( $n = 3$  independent experiments; Welch's  $t$  test;  $*$ ,  $P < 0.05$ ;  $**$ ,  $P < 0.01$ ).

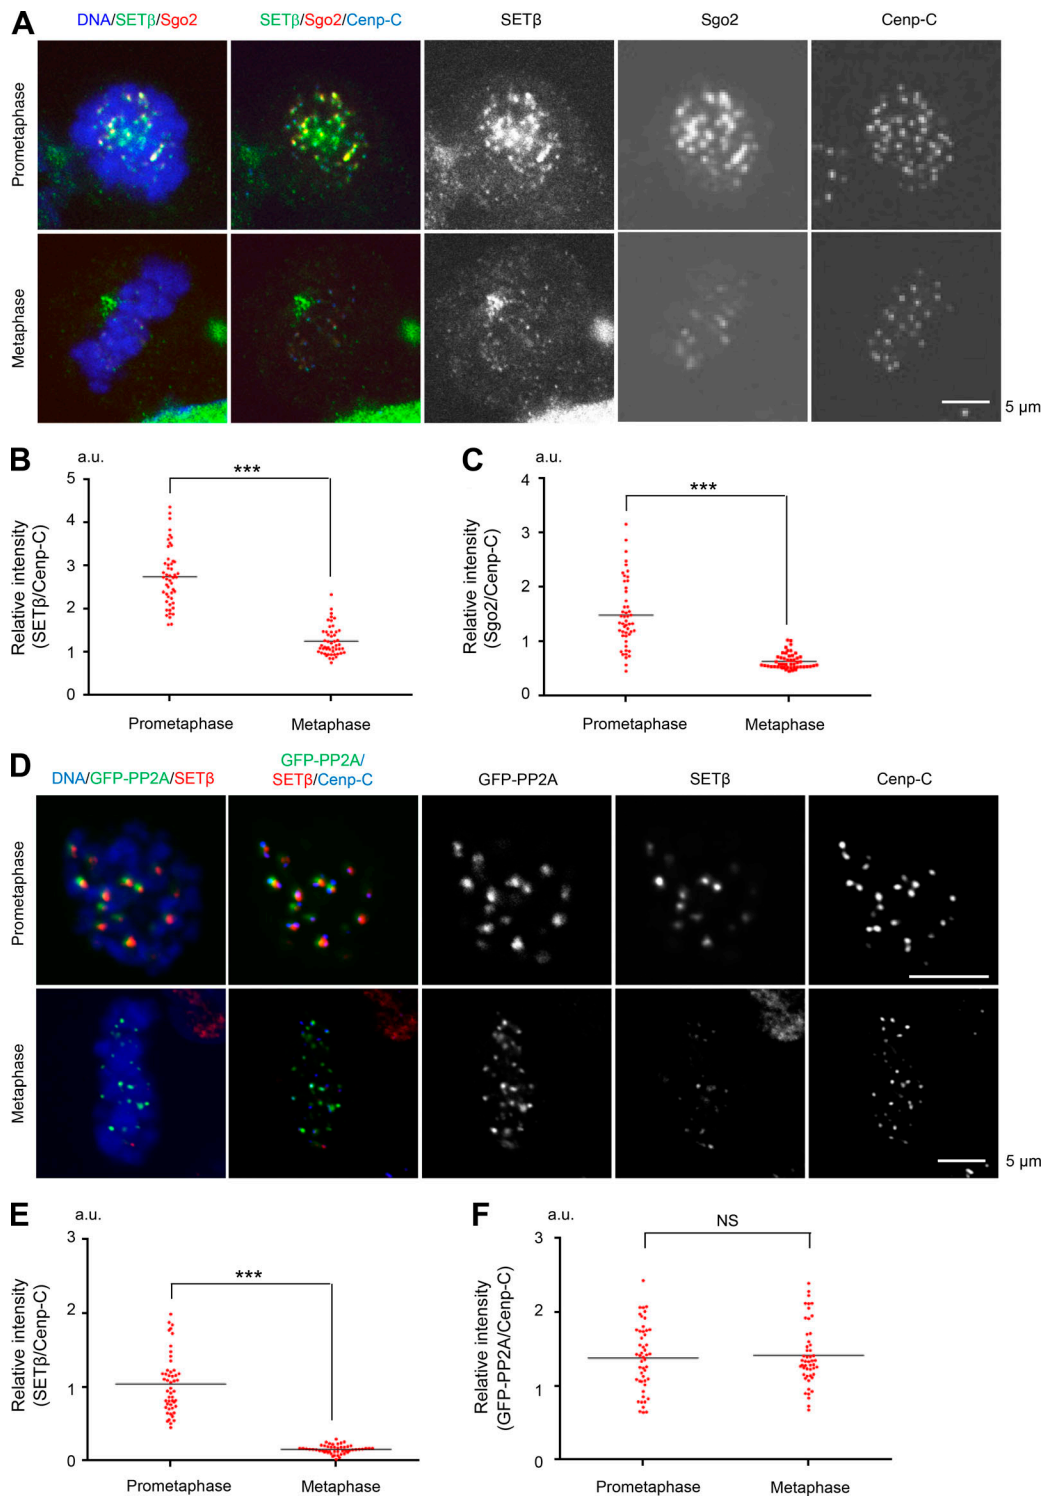

Figure S5. **The SETβ signal at centromere/kinetochore weakens in metaphase.** (A–C) Comparison between centromeric localization at prometaphase and kinetochore localization at metaphase of SETβ and Sgo2 ( $n = 50$  kinetochore pairs from 10 cells; Mann-Whitney  $U$  test; \*\*\*,  $P < 0.001$ ). (D–F) Comparison of centromere/kinetochore localization of SETβ and GFP-PP2A B56α between prometaphase and metaphase. HeLa cells expressing GFP-PP2A-B56α were synchronized at prometaphase with colcemid or at metaphase with MG132 and then stained with anti-SETβ and Cenp-C antibodies. Relative fluorescence intensities of GFP-PP2A B56α or SETβ toward anti-Cenp-C antibodies were quantified at five centromeres in each cell. Each bar represents the mean ( $n = 50$  kinetochore pairs from 10 cells; Mann-Whitney  $U$  test; \*\*\*,  $P < 0.001$ ). Scale bars, 5  $\mu$ m.
